# Supplementary material for: Statistical errors in reduced density matrices sampled from quantum circuit simulation and the impact on multireference perturbation theory
Source: Royal Society of Chemistry journal article supplement (doi:10.1039/d3cp03520d), 2023-01-01
Supplement: d3cp03520d1.pdf [file d3cp03520d1.pdf]

1 Supporting Information for Statistical Errors in Active-Space Reduced  
2 Density Matrices Sampled from Quantum Circuit Simulators and the  
3 Impact on Multireference Theory Calculations

4 Yuki Oba<sup>1</sup>, Soichiro Nishio<sup>1</sup>, and Yuki Kurashige\*<sup>1</sup>

5 <sup>1</sup>Department of Chemistry, Graduate School of Science, Kyoto University, Kitashirakawa

6 Oiwake-cho, Sakyo-ku Kyoto, 606-8502, Japan

7 October 2, 2023

8 **S1 Derivation of observation probability representation for elements**  
9 **of reduced density matrices**

10 In this section, we present derivation of observation probability representation for elements of reduced density  
11 matrices by using an example of  $\langle \Psi | a_p^\dagger a_q | \Psi \rangle$  with indices such that  $p > q$  for simplicity.

12 With Jordan-Wigner transformation, and with the relations  $P_p^X = H_p P_p^Z H_p$  and  $P_p^Y = R_p^X [-\pi/2] P_p^Z R_p^X [\pi/2]$ ,  
13 the reduced density operator is transformed into representation with  $P_p^Z$ ,  $H_p$ , and  $R_p^X$ :

---

\*Electronic mail: kura@kuchem.kyoto-u.ac.jp.

$$a_p^\dagger a_q = \frac{1}{2} \left[ \prod_{l=1}^{p-1} P_l^Z \right] (P_p^X - jP_p^Y) \cdot \frac{1}{2} \left[ \prod_{m=1}^{q-1} P_m^Z \right] (P_q^X + jP_q^Y) \quad (\text{S1})$$

$$= \frac{1}{4} \left[ \prod_{l=q}^{p-1} P_l^Z \right] (P_p^X - jP_p^Y)(P_q^X + jP_q^Y) \quad (\text{S2})$$

$$= \frac{1}{4} \left[ \prod_{l=q}^{p-1} P_l^Z \right] (P_p^X P_q^X + jP_p^X P_q^Y - jP_p^Y P_q^X + P_p^Y P_q^Y) \quad (\text{S3})$$

$$= \frac{1}{4} \left[ \prod_{l=q}^{p-1} P_l^Z \right] \left\{ (H_p P_p^Z H_p)(H_q P_q^Z H_q) + j(H_p P_p^Z H_p)(R_q^X[-\pi/2] P_q^Z R_q^X[\pi/2]) \right. \\ \left. - j(R_p^X[-\pi/2] P_p^Z R_p^X[\pi/2])(H_q P_q^Z H_q) + (R_p^X[-\pi/2] P_p^Z R_p^X[\pi/2])(R_q^X[-\pi/2] P_q^Z R_q^X[\pi/2]) \right\}, \quad (\text{S4})$$

$$4a_p^\dagger a_q = H_q H_p \left[ \prod_{l=q+1}^p P_l^Z \right] H_p H_q + j \cdot R_q^X[-\pi/2] H_p \left[ \prod_{l=q+1}^p P_l^Z \right] H_p R_q^X[\pi/2] \\ - j \cdot H_q R_p^X[-\pi/2] \left[ \prod_{l=q+1}^p P_l^Z \right] R_p^X[\pi/2] H_q + R_q^X[-\pi/2] R_p^X[-\pi/2] \left[ \prod_{l=q+1}^p P_l^Z \right] R_p^X[\pi/2] R_q^X[\pi/2]. \quad (\text{S5})$$

14 Therefore the matrix element for a CAS wavefunction  $|\Psi_{\text{CAS}}\rangle$  is written as

$$\langle \Psi_{\text{CAS}} | a_p^\dagger a_q | \Psi_{\text{CAS}} \rangle = \frac{1}{4} \langle \Psi_{\text{CAS}} | H_q H_p \left[ \prod_{l=q+1}^p P_l^Z \right] H_p H_q | \Psi_{\text{CAS}} \rangle \\ + \frac{j}{4} \langle \Psi_{\text{CAS}} | R_q^X[-\pi/2] H_p \left[ \prod_{l=q+1}^p P_l^Z \right] H_p R_q^X[\pi/2] | \Psi_{\text{CAS}} \rangle \\ - \frac{j}{4} \langle \Psi_{\text{CAS}} | H_q R_p^X[-\pi/2] \left[ \prod_{l=q+1}^p P_l^Z \right] R_p^X[\pi/2] H_q | \Psi_{\text{CAS}} \rangle \\ + \frac{1}{4} \langle \Psi_{\text{CAS}} | R_q^X[-\pi/2] R_p^X[-\pi/2] \left[ \prod_{l=q+1}^p P_l^Z \right] R_p^X[\pi/2] R_q^X[\pi/2] | \Psi_{\text{CAS}} \rangle. \quad (\text{S6})$$

15 Let  $|\mathbf{k}\rangle$  be an occupation number vector,

$$|\mathbf{k}\rangle = |k_1, \dots, k_p, \dots, k_N\rangle \quad (\text{S7})$$

$$= |k_1\rangle \otimes \dots \otimes |k_p\rangle \otimes \dots \otimes |k_N\rangle. \quad (\text{S8})$$

16 Here,  $k_p$  is equal to 1 if the  $p$ -th spin-orbital is occupied; otherwise  $k_p$  is equal to 0.  $|0\rangle$  and  $|1\rangle$  correspond to the  
 17 eigenstate of  $P^Z$  for a qubit. In eq.(S6), the CAS wavefunction  $|\Psi_{\text{CAS}}\rangle$ , which is written with expansion coefficients  
 18  $c_{\mathbf{k}}$  as  $|\Psi_{\text{CAS}}\rangle = \sum_{\mathbf{k}} c_{\mathbf{k}} |\mathbf{k}\rangle$ , is transformed by several unitary operators. We denote these unitary-transformed  
 19 wavefunctions as following:

$$|\Psi^{HH}\rangle \equiv H_p H_q |\Psi_{\text{CAS}}\rangle = \sum_{\mathbf{k}} \tilde{c}_{\mathbf{k}}^{HH} |\mathbf{k}\rangle, \quad (\text{S9})$$

$$|\Psi^{HR}\rangle \equiv H_p R_q^X[\pi/2] |\Psi_{\text{CAS}}\rangle = \sum_{\mathbf{k}} \tilde{c}_{\mathbf{k}}^{HR} |\mathbf{k}\rangle, \quad (\text{S10})$$

$$|\Psi^{RH}\rangle \equiv R_p^X[\pi/2] H_q |\Psi_{\text{CAS}}\rangle = \sum_{\mathbf{k}} \tilde{c}_{\mathbf{k}}^{RH} |\mathbf{k}\rangle, \quad (\text{S11})$$

$$|\Psi^{RR}\rangle \equiv R_p^X[\pi/2] R_q^X[\pi/2] |\Psi_{\text{CAS}}\rangle = \sum_{\mathbf{k}} \tilde{c}_{\mathbf{k}}^{RR} |\mathbf{k}\rangle. \quad (\text{S12})$$

20 By using eq.(S9) and  $P^Z = |0\rangle\langle 0| - |1\rangle\langle 1|$ , we rewrite the first term in eq.(S6) as

$$\begin{aligned} & \frac{1}{4} \langle \Psi_{\text{CAS}} | H_q H_p \left[ \prod_{l=q+1}^p P_l^Z \right] H_p H_q | \Psi_{\text{CAS}} \rangle \\ &= \frac{1}{4} \langle \Psi^{HH} | \left[ \prod_{l=q+1}^p P_l^Z \right] | \Psi^{HH} \rangle \\ &= \frac{1}{4} \langle \Psi^{HH} | \left[ \prod_{l=q+1}^p (|0_l\rangle\langle 0_l| - |1_l\rangle\langle 1_l|) \right] | \Psi^{HH} \rangle \\ &= \frac{1}{4} \langle \Psi^{HH} | (-1)^{\sum_{l=q+1}^p k_l} | \Psi^{HH} \rangle \\ &= \frac{1}{4} \sum_{\mathbf{k}} (-1)^{\sum_{l=q+1}^p k_l} |\tilde{c}_{\mathbf{k}}^{HH}|^2. \end{aligned} \quad (\text{S13})$$

21 As a result of the above transformation, the first term in eq.(S6) can be expressed as a function of  $|\tilde{c}_{\mathbf{k}}^{HH}|^2$ . By ap-  
 22 plying similar transformations to the remaining terms in eq.(S6), and also to one-particle reduced density operators  
 23 with indices such that  $p \leq q$ , each component of 1RDM can be estimated based on  $|\tilde{c}_{\mathbf{k}}|^2$ , that is, the probability  
 24 of obtaining state  $|\mathbf{k}\rangle$  by observing the unitary-transformed CAS wave function represented on the quantum circuit.  
 25 Higher order RDMs can be estimated in the same way.

## 26 S2 Estimation of the $N_{\text{sample}}$ sufficient for the chemical accuracy for 27 polyenes

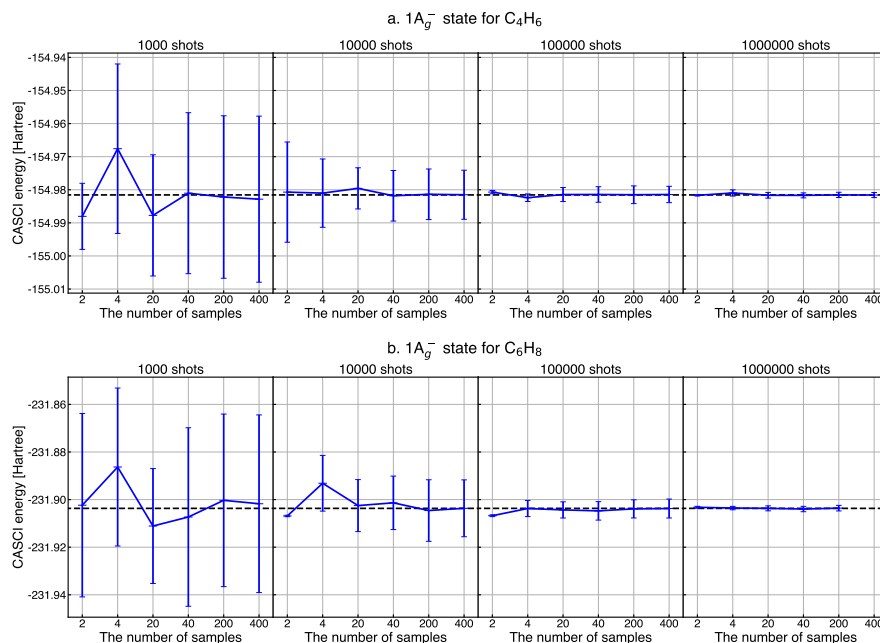

Figure S1: The convergence behaviour of the sample-mean CASCI energy of  $1A_g^-$  state for  $C_4H_6$  and  $C_6H_8$ .

28 We chose the value of  $N_{\text{sample}}$  as the number of sample that is sufficient for the sample-mean CASCI energy of  
 29 the  $1A_g^-$  state to converge within the chemical accuracy (1.0 kcal/mol) to the exact energy. As Fig. S1 shows, the  
 30 values of  $N_{\text{sample}}$  are determined to be 100 for  $N_{\text{shot}} = 10^3$  and  $10^4$ , and 20 for  $N_{\text{shot}} = 10^5, 10^6$ .

31 **S3** Least square fitting for the sampled CASCI energies and the sam-  
 32 pled CASPT2 energies

Table S1: Least square fitting for the sampled CASCI energies

|          |          | $A$    | $B$     | $R^2$  |
|----------|----------|--------|---------|--------|
|          | $1A_g^-$ | 0.8806 | -0.0005 | 0.9994 |
| $C_4H_6$ | $2A_g^-$ | 1.8318 | -0.0006 | 0.9984 |
|          | $1B_u^+$ | 1.3736 | +0.0004 | 0.9995 |
|          | $1A_g^-$ | 1.2475 | -0.0002 | 1.0000 |
| $C_6H_8$ | $2A_g^-$ | 2.0686 | -0.0002 | 0.9970 |
|          | $1B_u^+$ | 2.0031 | -0.0012 | 0.9982 |

33 The parameters  $A$  and  $B$  are defined as

$$\sigma(E) = A/\sqrt{N_{\text{shot}}} + B, \quad (\text{S14})$$

34 and  $R^2$  is the coefficient of determination.

35 **S4** Expected value of the sum of squared errors between the classical  
 36 CI vector and the observed vector

37 A set of squared CI coefficients in a CAS wavefunction  $|\Psi\rangle = \sum_i c_i |\psi_i\rangle$  can be considered as a set of probabilities  
 38  $P$  where a configuration  $|\psi_i\rangle$  is observed in the simulation of the present work,

Table S2: Least square fitting for the sampled cu(4)-CASPT2 energies

|          |          | $A$    | $B$     | $R^2$  |
|----------|----------|--------|---------|--------|
|          | $1A_g^-$ | 0.8860 | -0.0005 | 0.9995 |
| $C_4H_6$ | $2A_g^-$ | 1.8433 | -0.0005 | 0.9985 |
|          | $1B_u^+$ | 1.3628 | +0.0004 | 0.9995 |
|          | $1A_g^-$ | 1.3138 | -0.0008 | 0.9977 |
| $C_6H_8$ | $2A_g^-$ | 2.0022 | -0.0000 | 0.9973 |
|          | $1B_u^+$ | 1.1464 | +0.0028 | 0.9593 |

Table S3: Least square fitting for the sampled cu(3,4)-CASPT2 energies

|          |          | $A$    | $B$     | $R^2$  |
|----------|----------|--------|---------|--------|
|          | $1A_g^-$ | 0.9522 | -0.0007 | 0.9980 |
| $C_4H_6$ | $2A_g^-$ | 1.8392 | -0.0005 | 0.9984 |
|          | $1B_u^+$ | 1.3923 | +0.0006 | 0.9994 |
|          | $1A_g^-$ | 1.2946 | -0.0008 | 0.9989 |
| $C_6H_8$ | $2A_g^-$ | 2.0621 | -0.0002 | 0.9972 |
|          | $1B_u^+$ | 1.2153 | +0.0024 | 0.9685 |

$$P = \{|c_1|^2, |c_2|^2, \dots, |c_k|^2\} \quad (\text{S15})$$

$$= \{p_1, p_2, \dots, p_k\}. \quad (\text{S16})$$

39 By definition, the sum of  $p_i$  is equal to 1,

$$\sum_i^k p_k = 1. \quad (\text{S17})$$

40 Let us assume that we perform the sampling with  $N_{\text{shot}}$  and obtain an results  $R$  where  $|\psi_i\rangle$  is observed  $n_i$  times,

$$R = \{n_1, n_2, \dots, n_k\}, \quad (\text{S18})$$

41 and that  $R$  follows multinomial distribution with parameters  $N_{\text{shot}}$  and  $P$ . The probability mass function (PMF)

42 is given as

$$\text{PMF}(R; N_{\text{shot}}, P) = \frac{N_{\text{shot}}!}{n_1! n_2! \dots n_k!} p_1^{n_1} p_2^{n_2} \dots p_k^{n_k}. \quad (\text{S19})$$

43 The expected value for  $n_i$ ,  $\mathbb{E}[n_i]$ , and the variance for  $n_i$ ,  $\text{var}[n_i]$ , are given as

$$\mathbb{E}[n_i] = N_{\text{shot}} p_i, \quad (\text{S20})$$

$$\text{var}[n_i] = N_{\text{shot}} p_i (1 - p_i). \quad (\text{S21})$$

44 Here we define the observation error as the sum of squared errors (SSE) between  $P$  and  $R/N_{\text{shot}}$ ,

$$\text{SSE}(R; N_{\text{shot}}, P) = \sum_i^k (n_i/N_{\text{shot}} - p_i)^2. \quad (\text{S22})$$

45 The expected value for  $\text{SSE}(R; N_{\text{shot}}, P)$  is given by definition as

$$\mathbb{E}[\text{SSE}(R; N_{\text{shot}}, P)] = \sum_{n_1, \dots, n_k} \left\{ \text{PMF}(R; N_{\text{shot}}, P) \sum_i^k (n_i/N_{\text{shot}} - p_i)^2 \right\} \quad (\text{S23})$$

$$= \sum_i^k \mathbb{E}[(n_i/N_{\text{shot}} - p_i)^2] \quad (\text{S24})$$

46 The following formula transformation is performed by focusing on the term with  $(n_i/N_{\text{shot}} - p_i)^2$  of eq. (S24),

$$\mathbb{E}[(n_i/N_{\text{shot}} - p_i)^2] \quad (\text{S25})$$

$$= \sum_{n_1, \dots, n_k} \text{PMF}(R; N_{\text{shot}}, P) (n_i^2/N_{\text{shot}}^2 - 2n_i p_i/N_{\text{shot}} + p_i^2) \quad (\text{S26})$$

$$= \frac{\mathbb{E}[n_i^2]}{N_{\text{shot}}^2} - \frac{2p_i \mathbb{E}[n_i]}{N_{\text{shot}}} + p_i^2 \sum_{n_1, \dots, n_k} \text{PMF}(R; N_{\text{shot}}, P) \quad (\text{S27})$$

$$= \frac{\text{var}[n_i] + \mathbb{E}[n_i]^2}{N_{\text{shot}}^2} - \frac{2p_i N_{\text{shot}} p_i}{N_{\text{shot}}} + p_i^2 \cdot 1 \quad (\text{S28})$$

$$= \frac{N_{\text{shot}} p_i (1 - p_i) + N_{\text{shot}}^2 p_i^2}{N_{\text{shot}}^2} - \frac{2p_i N_{\text{shot}} p_i}{N_{\text{shot}}} + p_i^2 \quad (\text{S29})$$

$$= \frac{p_i - p_i^2}{N_{\text{shot}}}. \quad (\text{S30})$$

47 By summing over all  $i$ , the following formula is obtained,

$$\begin{aligned} \mathbb{E}[\text{SSE}(R; N_{\text{shot}}, P)] &= \sum_i^k \frac{p_i - p_i^2}{N_{\text{shot}}} \\ &= \frac{1 - \sum_i^k p_i^2}{N_{\text{shot}}} \end{aligned} \quad (\text{S31})$$

$$= \frac{1 - \sum_i^k |c_i|^4}{N_{\text{shot}}}. \quad (\text{S32})$$

48 From the inequality of the arithmetic mean and the geometric mean, it follows that the maximum value of

49  $\mathbb{E}[\text{SSE}(R; N_{\text{shot}}, P)]$  with fixed  $N_{\text{shot}}$  and  $k$  is  $(1 - \frac{1}{k})/N_{\text{shot}}$ , which is reached when  $p_i = \frac{1}{k}$  for all  $i$ .



50 **S5 Geometries of  $\{[\text{Cu}(\text{NH}_3)_3]_2\text{O}_2\}^{2+}$  complex along the reaction co-**

51 **ordinate**

$F = 0.0$

---

|    |    |    |             |             |             |
|----|----|----|-------------|-------------|-------------|
| 52 | 1  | O  | 0.00000000  | 0.00000000  | 1.14524700  |
| 53 | 2  | O  | 0.00000000  | 0.00000000  | -1.14524700 |
| 54 | 3  | Cu | -0.16460900 | 1.39103100  | 0.00000000  |
| 55 | 4  | Cu | 0.16460900  | -1.39103100 | 0.00000000  |
| 56 | 5  | N  | 0.00000000  | 2.69289600  | -1.50278000 |
| 57 | 6  | N  | 0.00000000  | 2.69289600  | 1.50278000  |
| 58 | 7  | N  | 0.00000000  | -2.69289600 | 1.50278000  |
| 59 | 8  | N  | 0.00000000  | -2.69289600 | -1.50278000 |
| 60 | 9  | N  | -2.62497900 | 1.61604600  | 0.00000000  |
| 61 | 10 | N  | 2.62497900  | -1.61604600 | 0.00000000  |
| 62 | 11 | H  | -3.19950700 | 2.46202600  | 0.00000000  |
| 63 | 12 | H  | 3.19950700  | -2.46202600 | 0.00000000  |
| 64 | 13 | H  | -2.93875400 | 1.07966600  | 0.81100500  |
| 65 | 14 | H  | 2.93875400  | -1.07966600 | -0.81100500 |
| 66 | 15 | H  | -2.93875400 | 1.07966600  | -0.81100500 |
| 67 | 16 | H  | 2.93875400  | -1.07966600 | 0.81100500  |
| 68 | 17 | H  | 0.88252700  | 3.20934800  | -1.53262500 |
| 69 | 18 | H  | 0.88252700  | 3.20934800  | 1.53262500  |
| 70 | 19 | H  | -0.88252700 | -3.20934800 | 1.53262500  |
| 71 | 20 | H  | -0.88252700 | -3.20934800 | -1.53262500 |
| 72 | 21 | H  | -0.76084000 | 3.37424500  | -1.53392600 |
| 73 | 22 | H  | -0.76084000 | 3.37424500  | 1.53392600  |
| 74 | 23 | H  | 0.76084000  | -3.37424500 | 1.53392600  |
| 75 | 24 | H  | 0.76084000  | -3.37424500 | -1.53392600 |
| 76 | 25 | H  | -0.04996700 | 2.13380200  | -2.35872700 |
| 77 | 26 | H  | -0.04996700 | 2.13380200  | 2.35872700  |
| 78 | 27 | H  | 0.04996700  | -2.13380200 | 2.35872700  |
| 79 | 28 | H  | 0.04996700  | -2.13380200 | -2.35872700 |
| 80 |    |    |             |             |             |
| 81 |    |    |             |             |             |

---

$$F = 0.2$$

---

|     |    |    |             |             |             |
|-----|----|----|-------------|-------------|-------------|
| 82  |    |    |             |             |             |
| 83  | 1  | O  | 0.00000000  | 0.00000000  | 1.06233000  |
| 84  | 2  | O  | 0.00000000  | 0.00000000  | -1.06233000 |
| 85  | 3  | Cu | -0.21403300 | 1.47433700  | 0.00000000  |
| 86  | 4  | Cu | 0.21403300  | -1.47433700 | 0.00000000  |
| 87  | 5  | N  | 0.00000000  | 2.76085100  | -1.52335400 |
| 88  | 6  | N  | 0.00000000  | 2.76085100  | 1.52335400  |
| 89  | 7  | N  | 0.00000000  | -2.76085100 | 1.52335400  |
| 90  | 8  | N  | 0.00000000  | -2.76085100 | -1.52335400 |
| 91  | 9  | N  | -2.62667900 | 1.62969200  | 0.00000000  |
| 92  | 10 | N  | 2.62667900  | -1.62969200 | 0.00000000  |
| 93  | 11 | H  | -3.19635300 | 2.47857100  | 0.00000000  |
| 94  | 12 | H  | 3.19635300  | -2.47857100 | 0.00000000  |
| 95  | 13 | H  | -2.93980200 | 1.09397400  | 0.81151900  |
| 96  | 14 | H  | 2.93980200  | -1.09397400 | -0.81151900 |
| 97  | 15 | H  | -2.93980200 | 1.09397400  | -0.81151900 |
| 98  | 16 | H  | 2.93980200  | -1.09397400 | 0.81151900  |
| 99  | 17 | H  | 0.90469100  | 3.21957500  | -1.56274200 |
| 100 | 18 | H  | 0.90469100  | 3.21957500  | 1.56274200  |
| 101 | 19 | H  | -0.90469100 | -3.21957500 | 1.56274200  |
| 102 | 20 | H  | -0.90469100 | -3.21957500 | -1.56274200 |
| 103 | 21 | H  | -0.70904000 | 3.48395300  | -1.54782700 |
| 104 | 22 | H  | -0.70904000 | 3.48395300  | 1.54782700  |
| 105 | 23 | H  | 0.70904000  | -3.48395300 | 1.54782700  |
| 106 | 24 | H  | 0.70904000  | -3.48395300 | -1.54782700 |
| 107 | 25 | H  | -0.09028700 | 2.21939400  | -2.38241400 |
| 108 | 26 | H  | -0.09028700 | 2.21939400  | 2.38241400  |
| 109 | 27 | H  | 0.09028700  | -2.21939400 | 2.38241400  |
| 110 | 28 | H  | 0.09028700  | -2.21939400 | -2.38241400 |

---

$$F = 0.4$$

---

|     |    |    |             |             |             |
|-----|----|----|-------------|-------------|-------------|
| 112 | 1  | O  | 0.00000000  | 0.00000000  | 0.97941300  |
| 113 | 2  | O  | 0.00000000  | 0.00000000  | -0.97941300 |
| 114 | 3  | Cu | -0.26345700 | 1.55764300  | 0.00000000  |
| 115 | 4  | Cu | 0.26345700  | -1.55764300 | 0.00000000  |
| 116 | 5  | N  | 0.00000000  | 2.82880600  | -1.54392700 |
| 117 | 6  | N  | 0.00000000  | 2.82880600  | 1.54392700  |
| 118 | 7  | N  | 0.00000000  | -2.82880600 | 1.54392700  |
| 119 | 8  | N  | 0.00000000  | -2.82880600 | -1.54392700 |
| 120 | 9  | N  | -2.62837900 | 1.64333900  | 0.00000000  |
| 121 | 10 | N  | 2.62837900  | -1.64333900 | 0.00000000  |
| 122 | 11 | H  | -3.19319900 | 2.49511600  | 0.00000000  |
| 123 | 12 | H  | 3.19319900  | -2.49511600 | 0.00000000  |
| 124 | 13 | H  | -2.94085000 | 1.10828200  | 0.81203400  |
| 125 | 14 | H  | 2.94085000  | -1.10828200 | -0.81203400 |
| 126 | 15 | H  | -2.94085000 | 1.10828200  | -0.81203400 |
| 127 | 16 | H  | 2.94085000  | -1.10828200 | 0.81203400  |
| 128 | 17 | H  | 0.92685400  | 3.22980200  | -1.59285900 |
| 129 | 18 | H  | 0.92685400  | 3.22980200  | 1.59285900  |
| 130 | 19 | H  | -0.92685400 | -3.22980200 | 1.59285900  |
| 131 | 20 | H  | -0.92685400 | -3.22980200 | -1.59285900 |
| 132 | 21 | H  | -0.65724000 | 3.59366100  | -1.56172800 |
| 133 | 22 | H  | -0.65724000 | 3.59366100  | 1.56172800  |
| 134 | 23 | H  | 0.65724000  | -3.59366100 | 1.56172800  |
| 135 | 24 | H  | 0.65724000  | -3.59366100 | -1.56172800 |
| 136 | 25 | H  | -0.13060700 | 2.30498500  | -2.40610100 |
| 137 | 26 | H  | -0.13060700 | 2.30498500  | 2.40610100  |
| 138 | 27 | H  | 0.13060700  | -2.30498500 | 2.40610100  |
| 139 | 28 | H  | 0.13060700  | -2.30498500 | -2.40610100 |

---

$$F = 0.6$$

---

|     |    |    |             |             |             |
|-----|----|----|-------------|-------------|-------------|
| 142 | 1  | O  | 0.00000000  | 0.00000000  | 0.89649600  |
| 143 | 2  | O  | 0.00000000  | 0.00000000  | -0.89649600 |
| 144 | 3  | Cu | -0.31288200 | 1.64094800  | 0.00000000  |
| 145 | 4  | Cu | 0.31288200  | -1.64094800 | 0.00000000  |
| 146 | 5  | N  | 0.00000000  | 2.89676200  | -1.56450100 |
| 147 | 6  | N  | 0.00000000  | 2.89676200  | 1.56450100  |
| 148 | 7  | N  | 0.00000000  | -2.89676200 | 1.56450100  |
| 149 | 8  | N  | 0.00000000  | -2.89676200 | -1.56450100 |
| 150 | 9  | N  | -2.63007800 | 1.65698500  | 0.00000000  |
| 151 | 10 | N  | 2.63007800  | -1.65698500 | 0.00000000  |
| 152 | 11 | H  | -3.19004600 | 2.51166000  | 0.00000000  |
| 153 | 12 | H  | 3.19004600  | -2.51166000 | 0.00000000  |
| 154 | 13 | H  | -2.94189800 | 1.12259100  | 0.81254800  |
| 155 | 14 | H  | 2.94189800  | -1.12259100 | -0.81254800 |
| 156 | 15 | H  | -2.94189800 | 1.12259100  | -0.81254800 |
| 157 | 16 | H  | 2.94189800  | -1.12259100 | 0.81254800  |
| 158 | 17 | H  | 0.94901800  | 3.24002900  | -1.62297600 |
| 159 | 18 | H  | 0.94901800  | 3.24002900  | 1.62297600  |
| 160 | 19 | H  | -0.94901800 | -3.24002900 | 1.62297600  |
| 161 | 20 | H  | -0.94901800 | -3.24002900 | -1.62297600 |
| 162 | 21 | H  | -0.60543900 | 3.70336800  | -1.57563000 |
| 163 | 22 | H  | -0.60543900 | 3.70336800  | 1.57563000  |
| 164 | 23 | H  | 0.60543900  | -3.70336800 | 1.57563000  |
| 165 | 24 | H  | 0.60543900  | -3.70336800 | -1.57563000 |
| 166 | 25 | H  | -0.17092700 | 2.39057700  | -2.42978700 |
| 167 | 26 | H  | -0.17092700 | 2.39057700  | 2.42978700  |
| 168 | 27 | H  | 0.17092700  | -2.39057700 | 2.42978700  |
| 169 | 28 | H  | 0.17092700  | -2.39057700 | -2.42978700 |

---

$$F = 0.8$$

---

|     |    |    |             |             |             |
|-----|----|----|-------------|-------------|-------------|
| 172 | 1  | O  | 0.00000000  | 0.00000000  | 0.81357900  |
| 173 |    |    |             |             |             |
| 174 | 2  | O  | 0.00000000  | 0.00000000  | -0.81357900 |
| 175 | 3  | Cu | -0.36230600 | 1.72425400  | 0.00000000  |
| 176 | 4  | Cu | 0.36230600  | -1.72425400 | 0.00000000  |
| 177 | 5  | N  | 0.00000000  | 2.96471700  | -1.58507400 |
| 178 | 6  | N  | 0.00000000  | 2.96471700  | 1.58507400  |
| 179 | 7  | N  | 0.00000000  | -2.96471700 | 1.58507400  |
| 180 | 8  | N  | 0.00000000  | -2.96471700 | -1.58507400 |
| 181 | 9  | N  | -2.63177800 | 1.67063200  | 0.00000000  |
| 182 | 10 | N  | 2.63177800  | -1.67063200 | 0.00000000  |
| 183 | 11 | H  | -3.18689200 | 2.52820500  | 0.00000000  |
| 184 | 12 | H  | 3.18689200  | -2.52820500 | 0.00000000  |
| 185 | 13 | H  | -2.94294600 | 1.13689900  | 0.81306300  |
| 186 | 14 | H  | 2.94294600  | -1.13689900 | -0.81306300 |
| 187 | 15 | H  | -2.94294600 | 1.13689900  | -0.81306300 |
| 188 | 16 | H  | 2.94294600  | -1.13689900 | 0.81306300  |
| 189 | 17 | H  | 0.97118100  | 3.25025600  | -1.65309300 |
| 190 | 18 | H  | 0.97118100  | 3.25025600  | 1.65309300  |
| 191 | 19 | H  | -0.97118100 | -3.25025600 | 1.65309300  |
| 192 | 20 | H  | -0.97118100 | -3.25025600 | -1.65309300 |
| 193 | 21 | H  | -0.55363900 | 3.81307600  | -1.58953100 |
| 194 | 22 | H  | -0.55363900 | 3.81307600  | 1.58953100  |
| 195 | 23 | H  | 0.55363900  | -3.81307600 | 1.58953100  |
| 196 | 24 | H  | 0.55363900  | -3.81307600 | -1.58953100 |
| 197 | 25 | H  | -0.21124700 | 2.47616800  | -2.45347400 |
| 198 | 26 | H  | -0.21124700 | 2.47616800  | 2.45347400  |
| 199 | 27 | H  | 0.21124700  | -2.47616800 | 2.45347400  |
| 200 | 28 | H  | 0.21124700  | -2.47616800 | -2.45347400 |
| 201 |    |    |             |             |             |

---

$$F = 1.0$$

---

|     |    |    |             |             |             |
|-----|----|----|-------------|-------------|-------------|
| 202 |    |    |             |             |             |
| 203 | 1  | O  | 0.00000000  | 0.00000000  | 0.73066200  |
| 204 | 2  | O  | 0.00000000  | 0.00000000  | -0.73066200 |
| 205 | 3  | Cu | -0.41173000 | 1.80756000  | 0.00000000  |
| 206 | 4  | Cu | 0.41173000  | -1.80756000 | 0.00000000  |
| 207 | 5  | N  | 0.00000000  | 3.03267200  | -1.60564800 |
| 208 | 6  | N  | 0.00000000  | 3.03267200  | 1.60564800  |
| 209 | 7  | N  | 0.00000000  | -3.03267200 | 1.60564800  |
| 210 | 8  | N  | 0.00000000  | -3.03267200 | -1.60564800 |
| 211 | 9  | N  | -2.63347800 | 1.68427800  | 0.00000000  |
| 212 | 10 | N  | 2.63347800  | -1.68427800 | 0.00000000  |
| 213 | 11 | H  | -3.18373800 | 2.54475000  | 0.00000000  |
| 214 | 12 | H  | 3.18373800  | -2.54475000 | 0.00000000  |
| 215 | 13 | H  | -2.94399400 | 1.15120700  | 0.81357700  |
| 216 | 14 | H  | 2.94399400  | -1.15120700 | -0.81357700 |
| 217 | 15 | H  | -2.94399400 | 1.15120700  | -0.81357700 |
| 218 | 16 | H  | 2.94399400  | -1.15120700 | 0.81357700  |
| 219 | 17 | H  | 0.99334500  | 3.26048300  | -1.68321000 |
| 220 | 18 | H  | 0.99334500  | 3.26048300  | 1.68321000  |
| 221 | 19 | H  | -0.99334500 | -3.26048300 | 1.68321000  |
| 222 | 20 | H  | -0.99334500 | -3.26048300 | -1.68321000 |
| 223 | 21 | H  | -0.50183900 | 3.92278400  | -1.60343200 |
| 224 | 22 | H  | -0.50183900 | 3.92278400  | 1.60343200  |
| 225 | 23 | H  | 0.50183900  | -3.92278400 | 1.60343200  |
| 226 | 24 | H  | 0.50183900  | -3.92278400 | -1.60343200 |
| 227 | 25 | H  | -0.25156700 | 2.56176000  | -2.47716100 |
| 228 | 26 | H  | -0.25156700 | 2.56176000  | 2.47716100  |
| 229 | 27 | H  | 0.25156700  | -2.56176000 | 2.47716100  |
| 230 | 28 | H  | 0.25156700  | -2.56176000 | -2.47716100 |
| 231 |    |    |             |             |             |

---
